# Supplementary material for: High-temperature dielectric polymer composite films of all-organic PVDF/ABS with excellent energy storage performance and stability
Source: Royal Society of Chemistry journal article supplement (doi:10.1039/d1tc05632h), 2022-01-01
Supplement: d1tc05632h1.pdf [file d1tc05632h1.pdf]

**High-temperature dielectric polymer composite films of all-organic PVDF/ABS  
with excellent energy storage performance and stability**

Ranran Zhang<sup>†a</sup>, Lili Li<sup>†a</sup>, Shaojun Long<sup>a</sup>, Ping Wang<sup>a</sup>, Fei Wen\*<sup>a</sup>, Junzhou Yang\*  
<sup>a,b</sup>, and Gaofeng Wang<sup>a</sup>

*<sup>a</sup>Engineering Research Center of Smart Microsensors and Microsystems, Ministry of  
Education, College of Electronics and Information, Hangzhou Dianzi University,  
Hangzhou 310018, China*

*<sup>b</sup>Zhengzhou Yansi Technology Co., Ltd*

\*Corresponding author E-mail address: wenfei@hdu.edu.cn (F. Wen),  
junzhou\_402@163.com (J Z Yang)

†These authors contributed equally: Ranran Zhang & Lili Li.

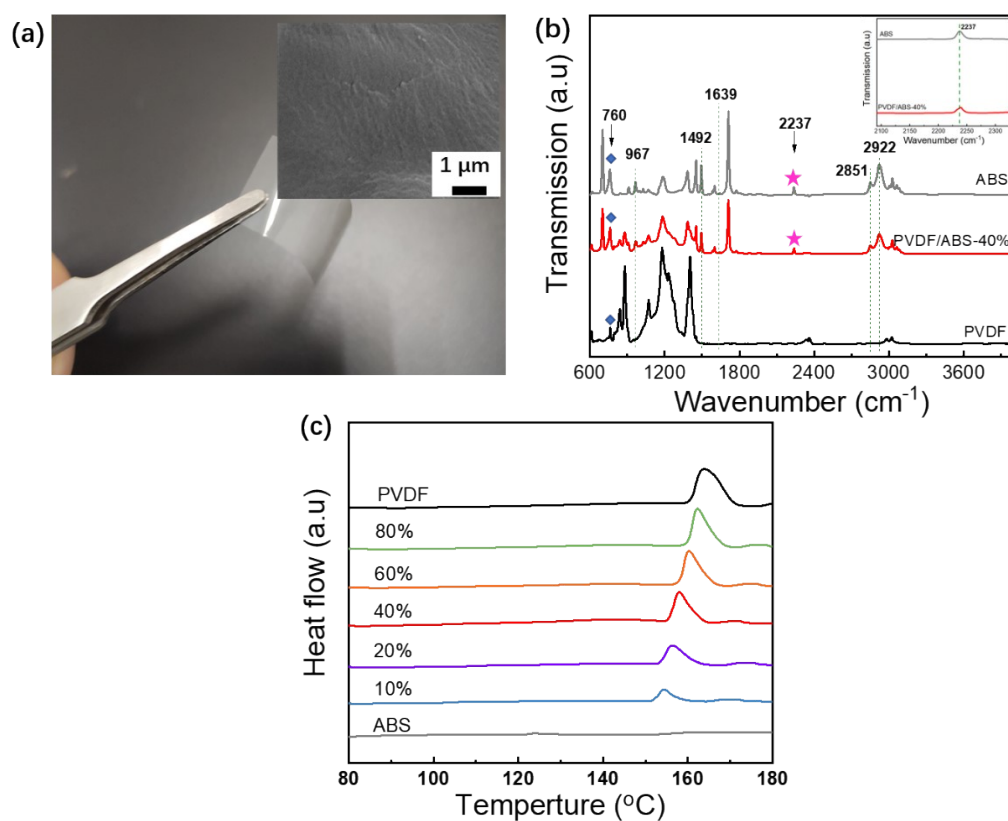

**Fig. S1** The optical image of the PVDF/ABS-40% (a), the FTIR patterns of PVDF, PVDF/ABS-40% and ABS (b), DSC curves of ABS, PVDF and PVDF/ABS composite films (c), the insert in Fig. S1a is the cross-section SEM image of PVDF/ABS-40%, the insert in Fig. S1b is the amplification at the position of 2237  $\text{cm}^{-1}$

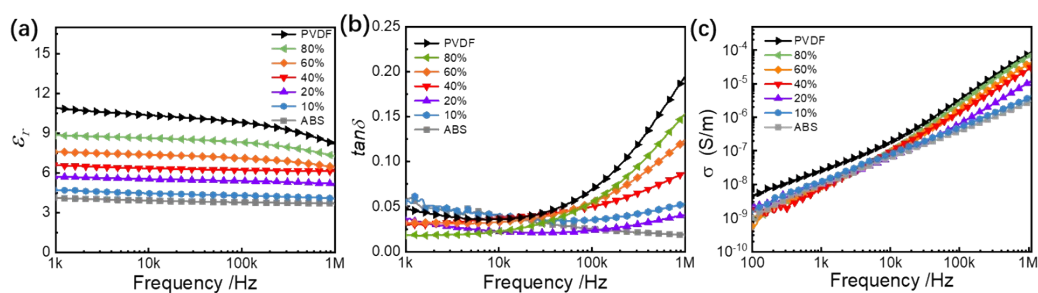

**Fig. S2** Frequency dependence of  $\epsilon_r$  (a),  $\tan \delta$  (b),  $\sigma$  (c),  $\epsilon_r$  and  $\tan \delta$  at 1 kHz (d) of ABS, PVDF and ABS/PVDF composite films at room temperature

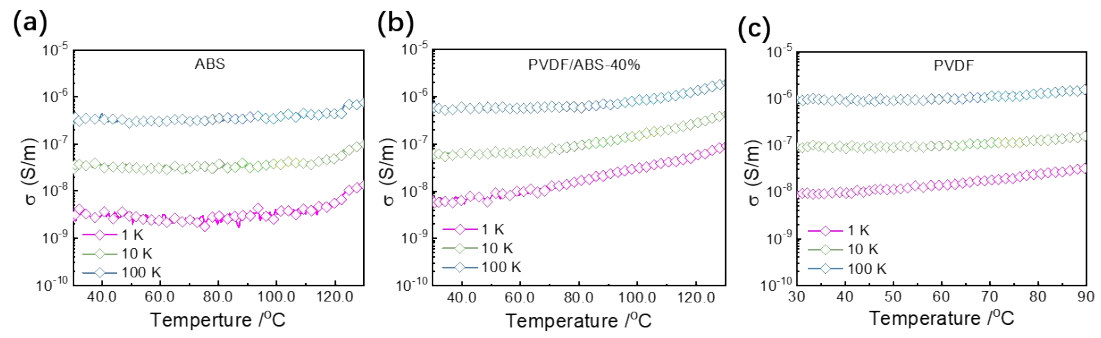

**Fig. S3** The  $\sigma$  as a function of temperature at frequencies of 1 kHz, 10 kHz and 100 kHz for ABS, PVDF/ABS-40% and PVDF

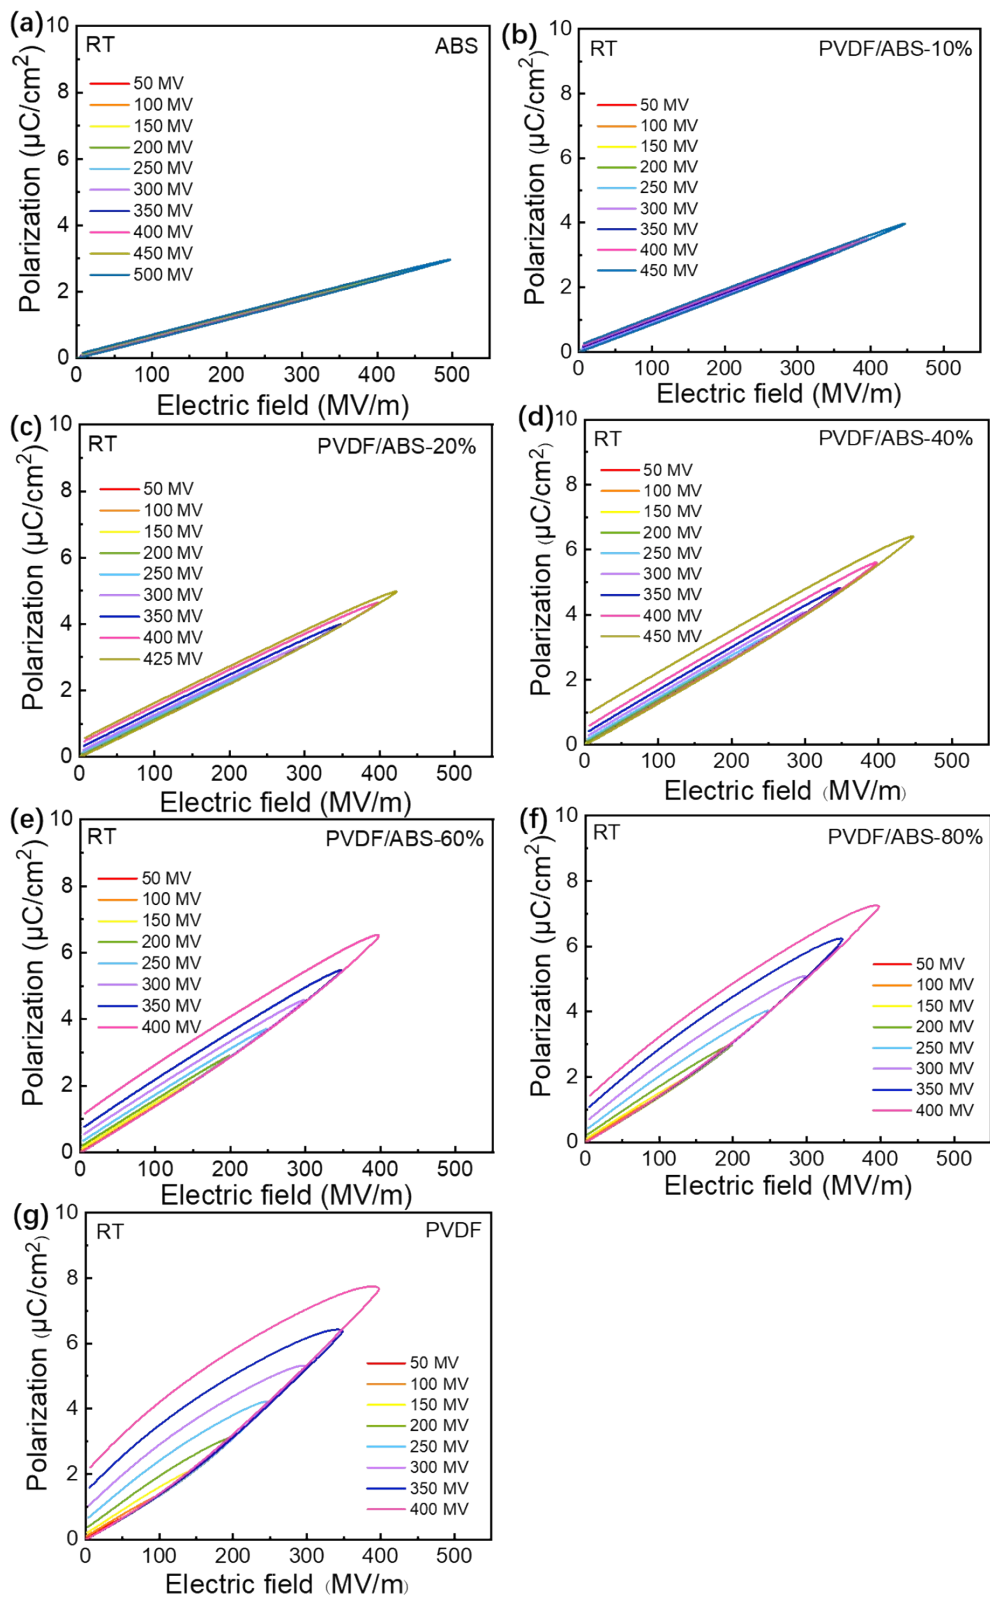

**Fig. S4** The  $P$ - $E$  loops of ABS, ABS/PVDF composite films and PVDF at room temperature

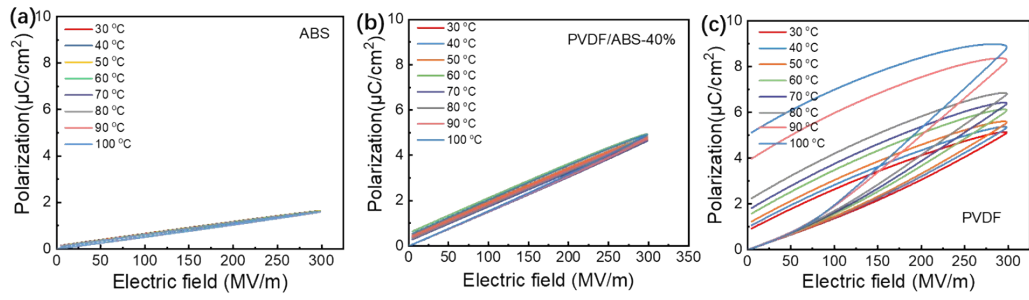

**Fig. S5** The  $P$ - $E$  loops as functions of temperature of ABS (a), PVDF/ABS-40% (b) and PVDF (c) under 300  $\text{MV}/\text{m}$

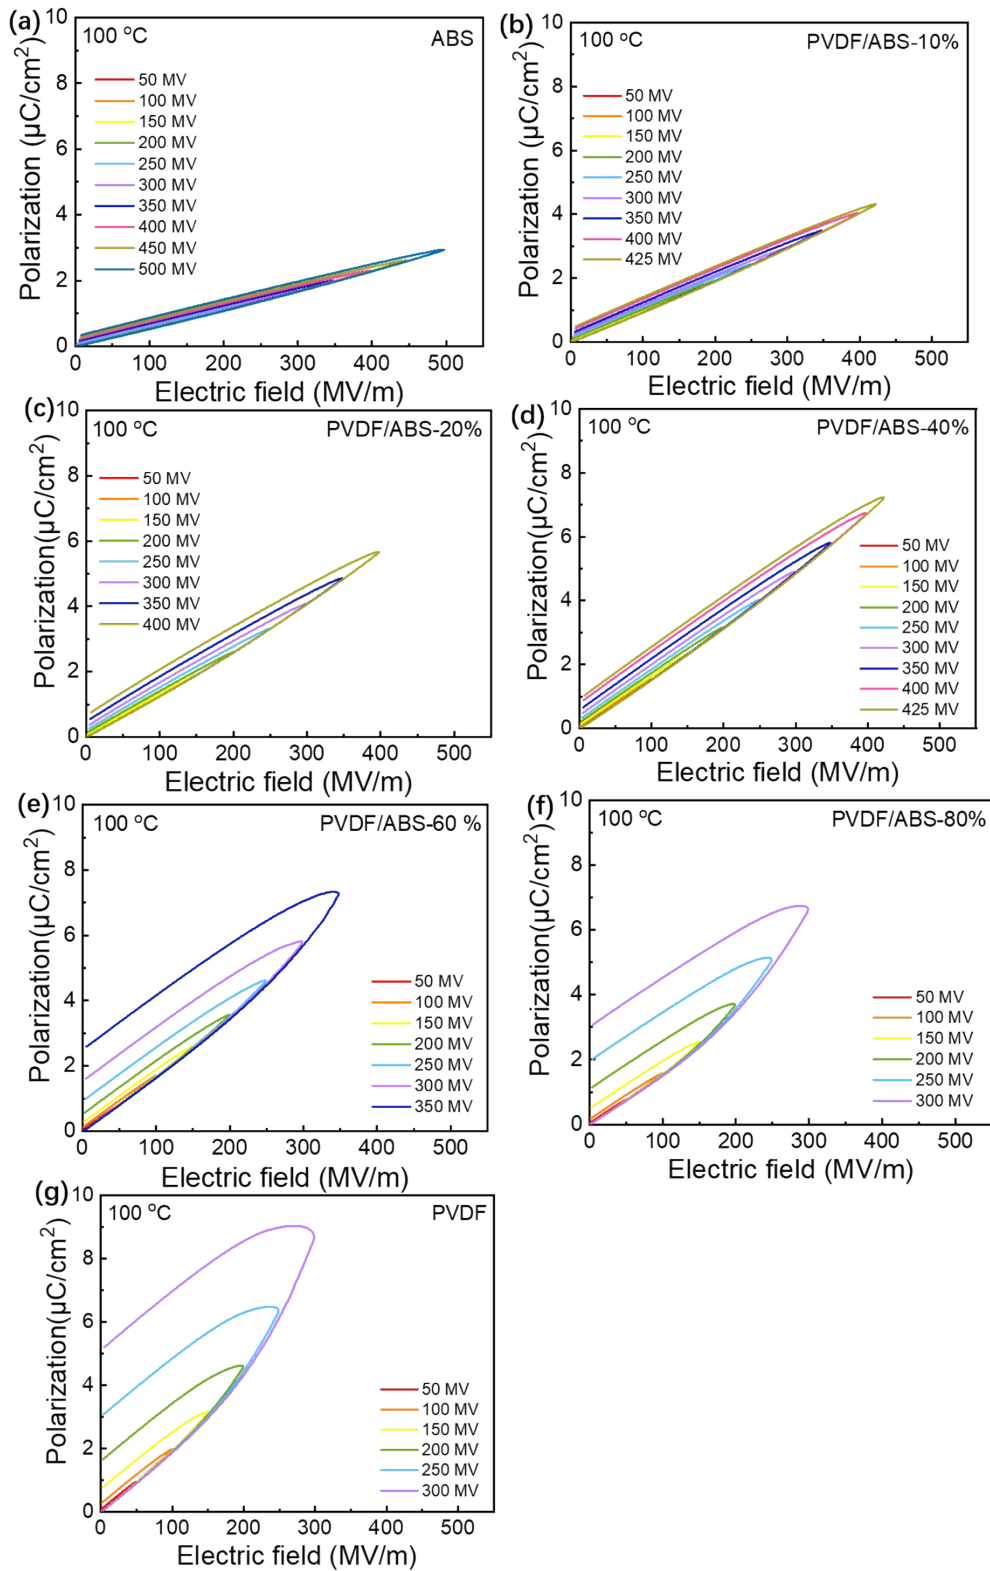

**Fig. S6** The  $P$ - $E$  loops for ABS, PVDF and ABS/PVDF composite films at elevated temperature ( $100^\circ\text{C}$ )

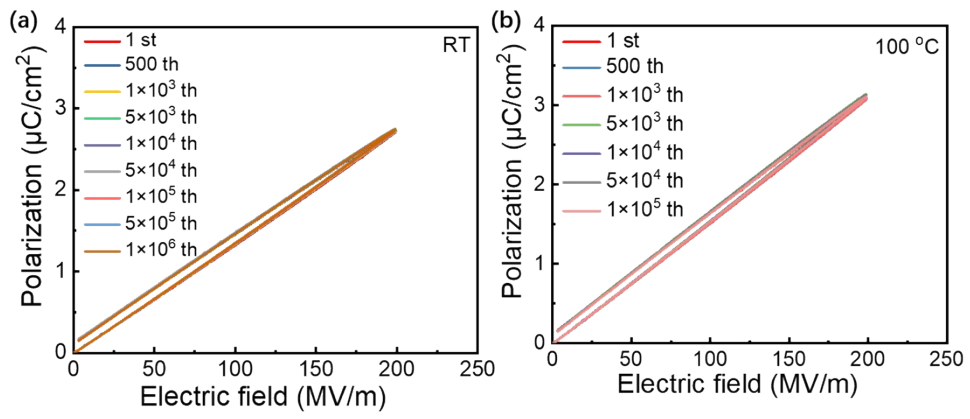

**Fig. S7** The  $P$ - $E$  loops with different cycling numbers at room temperature and 100 °C
